# Supplementary material for: Electro-mechanical factor affecting the Li+/Mg2+ selectivity performance of ion separation metal–organic frameworks
Source: Royal Society of Chemistry journal article supplement (doi:10.1039/d4ta02280g), 2024-01-01
Supplement: d4ta02280g2.pdf [file d4ta02280g2.pdf]

## Supporting Information

### **Electro-mechanical factor affecting the Li<sup>+</sup>/Mg<sup>2+</sup> selectivity performance of ion separation metal-organic frameworks**

*Yejin Lim<sup>a,b,1</sup>, Youngoh Kim<sup>a,b,1</sup>, Joonmyung Choi<sup>a,b,\*</sup>*

*<sup>a</sup>Department of Mechanical Design Engineering, Hanyang University,  
222 Wangsimni-ro, Seongdong-gu, Seoul 04763, Korea*

*<sup>b</sup>Department of Mechanical Engineering, BK21 FOUR ERICA-ACE Center,  
Hanyang University, 55 Hanyangdaehak-ro, Sangnok-gu Ansan 15588, Korea*

*<sup>1</sup> These authors contributed equally to this work.*

Corresponding author

E-mail address: [joonchoi@hanyang.ac.kr](mailto:joonchoi@hanyang.ac.kr)

## Supporting Information

**Table SI.** Lennard-Jones potential parameters used.

| Name | Description             | $\sigma$ (Å) | E (kcal/mol) | Ref. |
|------|-------------------------|--------------|--------------|------|
| Li   | Lithium                 | 2.13         | 0.0183       | [1]  |
| Mg   | Magnesium               | 2.63         | 0.000956     | [1]  |
| Cl   | Chlorine                | 4.42         | 0.118        | [1]  |
| Zr   | Zirconium               | 2.78         | 0.069        | [2]  |
| O    | Oxygen                  | 3.12         | 0.06         | [2]  |
| C    | Carbon                  | 3.43         | 0.105        | [2]  |
| Hc   | Hydrogen of UiO-66      | 2.57         | 0.044        | [2]  |
| N    | Nitrogen                | 3.25         | 0.16979      | [3]  |
| Hn   | Hydrogen of amine group | 0            | 0            | [3]  |
| Hw   | Hydrogen of water       | 0.4000       | 0.0460       | [4]  |
| Ow   | Oxygen of water         | 3.1507       | 0.1521       | [4]  |

**Table SII.** Composition of ionic solution and pure water.

| Ionic Solution |      |                   | Puer Water |
|----------------|------|-------------------|------------|
| Water          | LiCl | MgCl <sub>2</sub> | Water      |
| 5000           | 100  | 100               | 5000       |

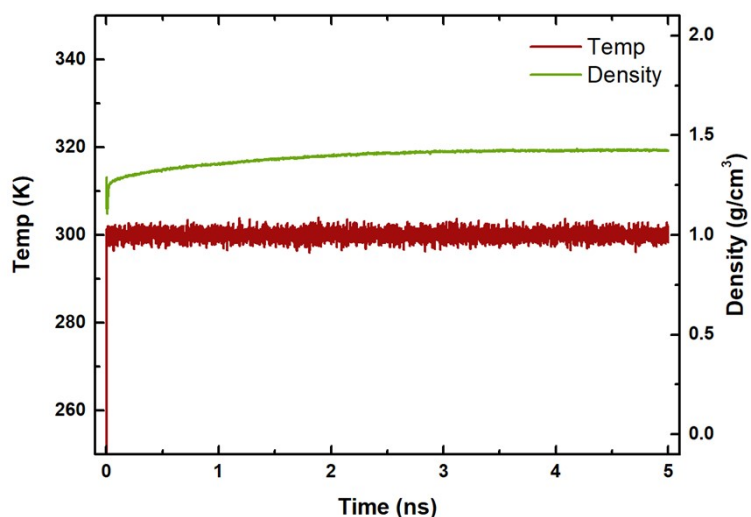

**Figure S1.** Convergence profiles of the temperature and density of the system over time under the NPT ensemble.

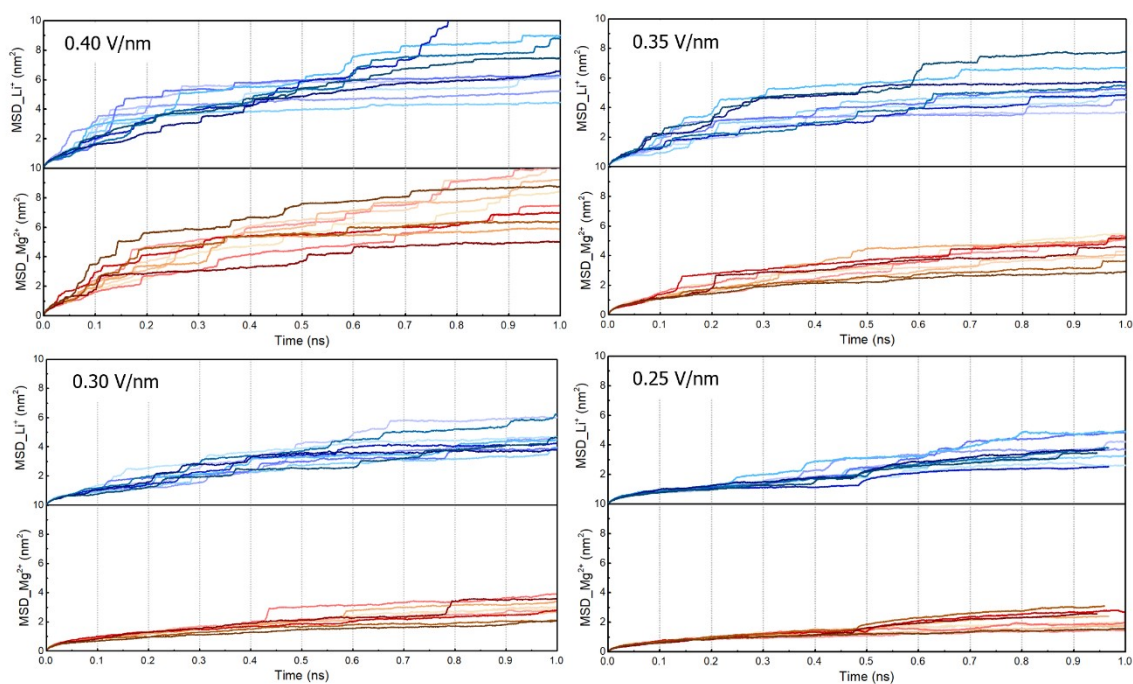

**Figure S2** MSD curve of ions obtained by simulation repeated 10 times under electric field application conditions. The MSD curve of  $\text{Li}^+$  shows a more frequent step-climbing behavior compared to that of  $\text{Mg}^{2+}$ , supporting the difference in the frequency of hydration shell collapse of the ions.

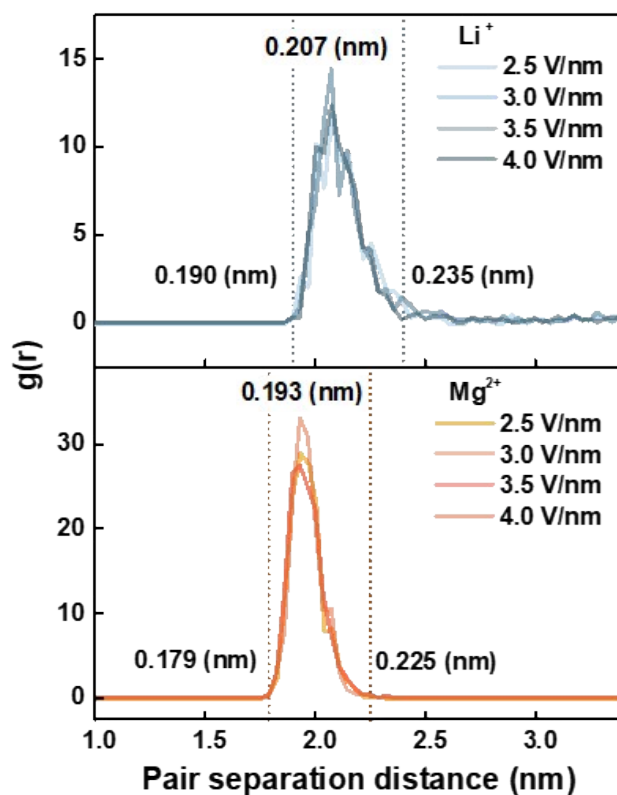

**Figure S3.** RDF curves of  $\text{Li}^+ - O_{\text{water}}$  and  $\text{Mg}^{2+} - O_{\text{water}}$ . The area where the peak profile formed (indicated by the dotted lines) was set as the effective thickness of the first water shell.

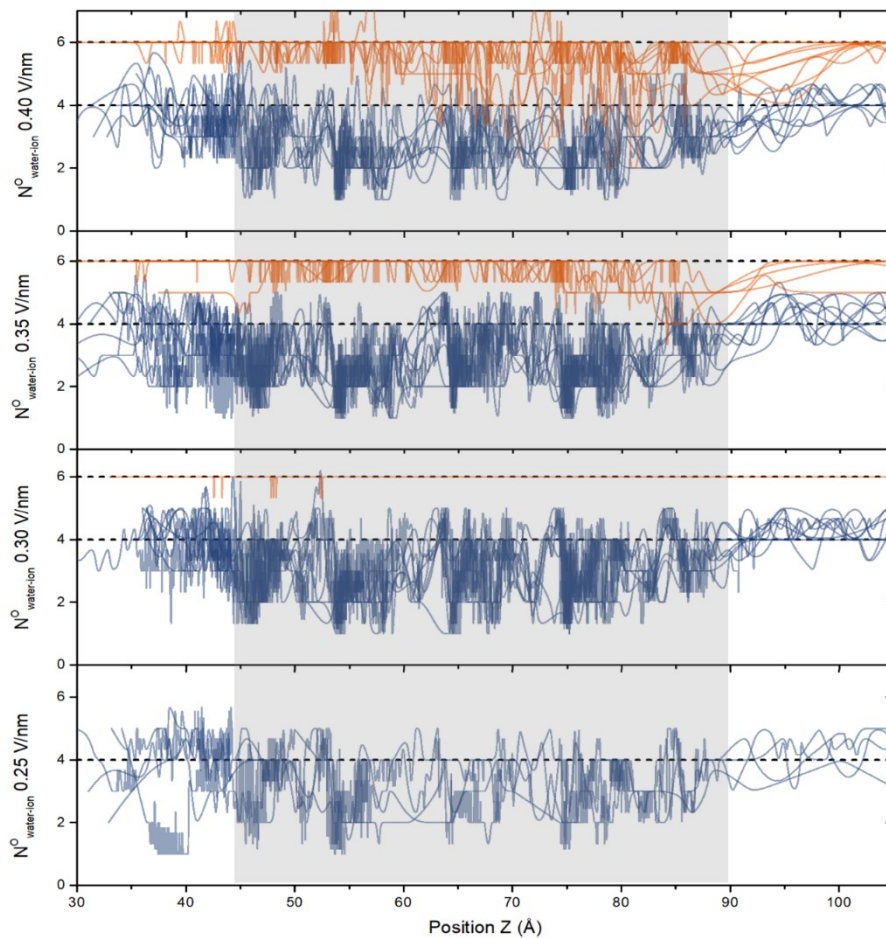

**Figure S4.** Ion-water ligand coordination number ( $N^O$ ) changes according to the electric field strength. (Red: lithium, blue: magnesium, and gray box: UiO-66-(NH<sub>2</sub>)<sub>2</sub> area)

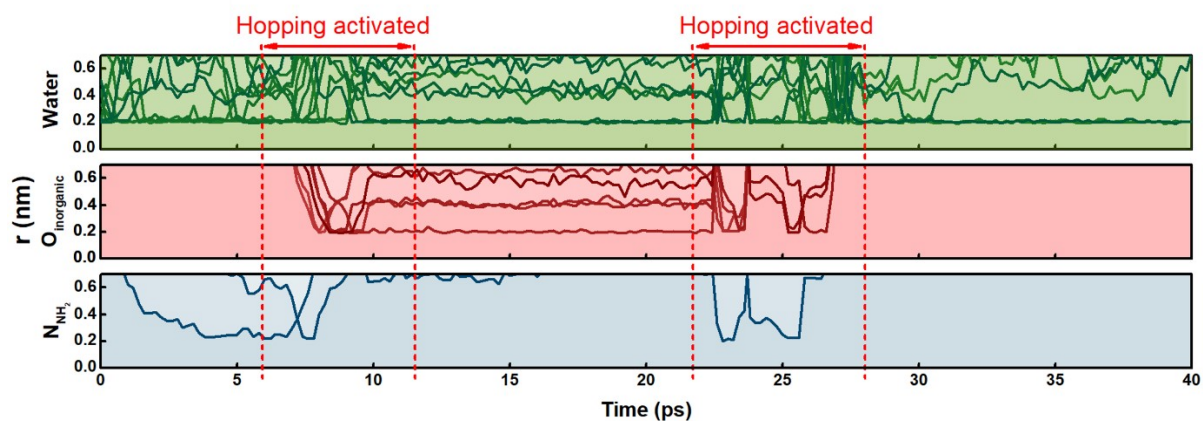

**Figure S5.** Results of classifying all hopping events of  $\text{Li}^+$  ions according to the hopping type (green: water to water, red: water to inorganic brick, blue: water to amine hopping). At this moment, water-to-amine hopping was initiated, and immediately thereafter, the other two types of hopping were also significantly activated.

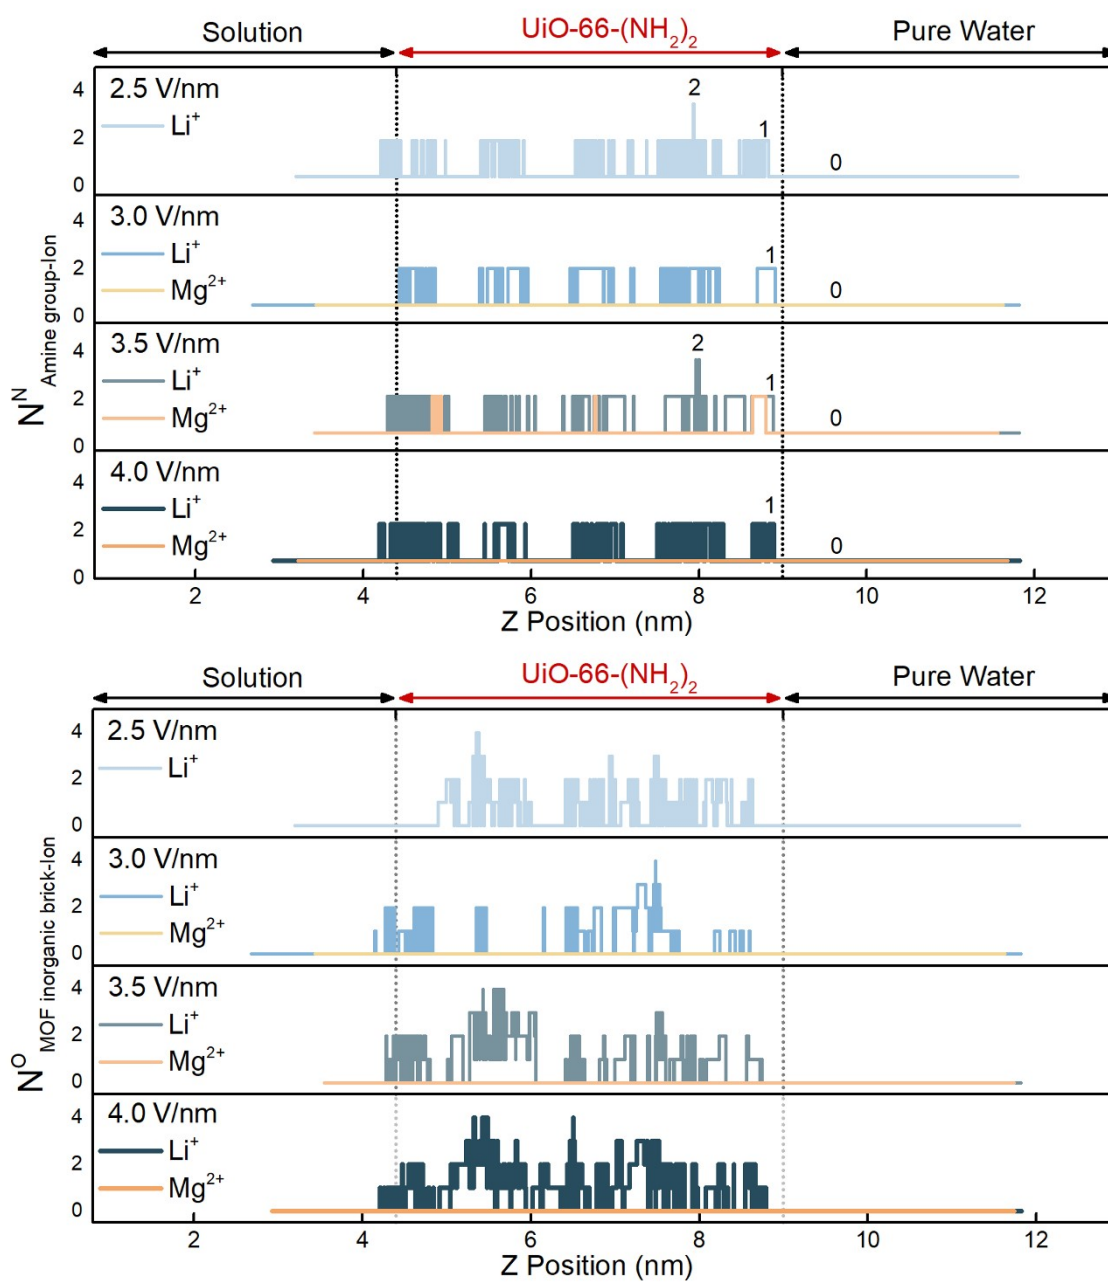

**Figure S6** Contributions of **a.** amine group and **b.** inorganic brick on the ion hopping kinetics while passing through UiO-66-(NH<sub>2</sub>)<sub>2</sub>. The coordination number for nitrogen ( $N^N$ ) of the amine group and oxygen anions ( $N^O$ ) of the inorganic brick is considered for characterization of their involvement in the ion hopping kinetics.

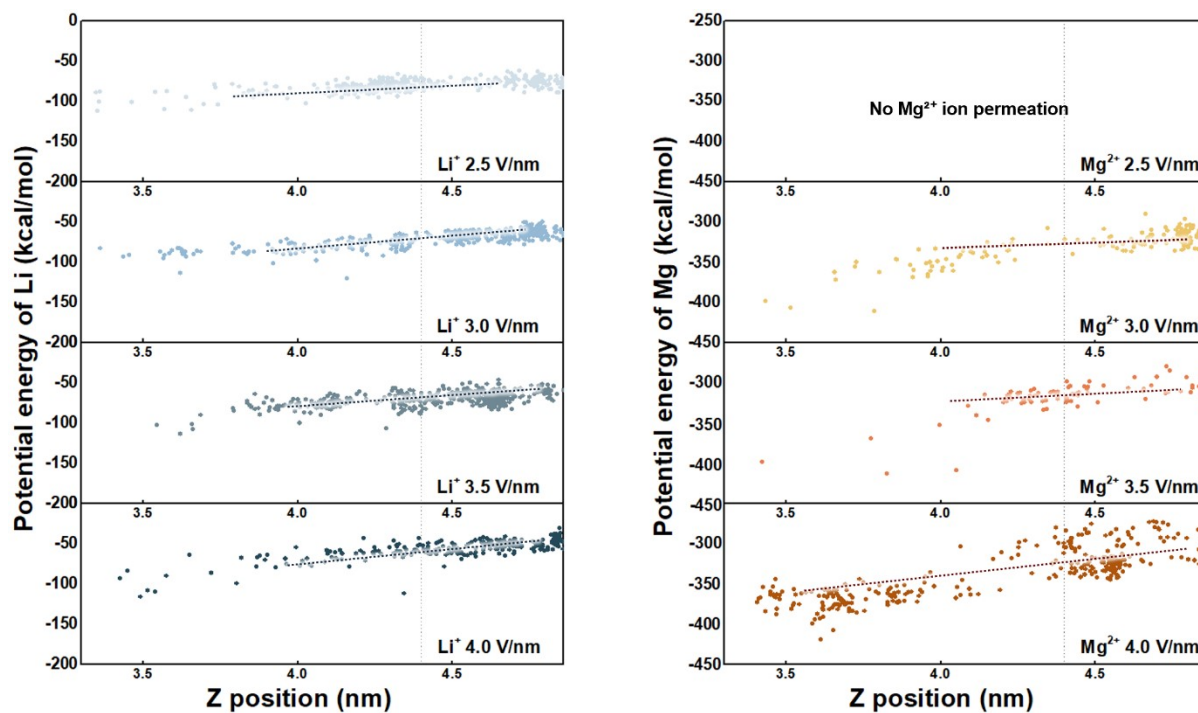

**Figure S7.** Potential energy distribution by the Z position of ions penetrating UiO-66-(NH<sub>2</sub>)<sub>2</sub> during the simulation time.

## References

- 1 X.-Y. Yue, Y.-Y. Li, Q.-W. Zhang, G. Liao and H.-B. Yi, *J. Mol. Liq.*, 2021, **327**, 114877.
- 2 S. K. Achar, J. J. Wardzala, L. Bernasconi, L. Zhang and J. K. Johnson, *J. Chem. Theor. Comput.*, 2022, **18**, 3593–3606.
- 3 A. Idrissi, M. Gerard, P. Damay, M. Kiselev, Y. Puhovsky, E. Cinar, P. Lagant and G. Vergoten, *J. Phys. Chem. B*, 2010, **114**, 4731–4738.
- 4 E. E. S. Ong and J.-L. Liow, *Fluid Phase Equilib.*, 2019, **481**, 55–65.
